# Supplementary material
Source: PubMed Central journal article supplement (PMC5177509)

# Supplementary Information for “An Optimized Charge Penetration Model for Use with the AMOEBA Force Field” by Rackers, Wang, Liu, Piquemal, Ren and Ponder

## 1. Damping Functions for Higher-order Damping

(Functions given in the same form as eq. 5 of Ref. 1)

### A. One-site damping functions

$$\lambda_1 = 1 - e^{-\alpha r}$$

$$\lambda_3 = 1 - (1 + \alpha r)e^{-\alpha r}$$

$$\lambda_5 = 1 - \left(1 + \alpha r + \left(\frac{1}{3}\right)(\alpha r)^2\right)e^{-\alpha r}$$

### B. Two site damping functions, $\alpha_i \neq \alpha_k$

$$A = \frac{\alpha_k^2}{\alpha_k^2 - \alpha_i^2}, \quad B = \frac{\alpha_i^2}{\alpha_i^2 - \alpha_k^2}$$

$$\lambda_1 = 1 - Ae^{-\alpha_i r} - Be^{-\alpha_k r}$$

$$\lambda_3 = 1 - (1 + \alpha_i r)Ae^{-\alpha_i r} - (1 + \alpha_k r)Be^{-\alpha_k r}$$

$$\lambda_5 = 1 - \left(1 + \alpha_i r + \left(\frac{1}{3}\right)(\alpha_i r)^2\right)Ae^{-\alpha_i r} - \left(1 + \alpha_k r + \left(\frac{1}{3}\right)(\alpha_k r)^2\right)Be^{-\alpha_k r}$$

$$\lambda_7 = 1 - \left(1 + \alpha_i r + \left(\frac{2}{5}\right)(\alpha_i r)^2 + \left(\frac{1}{15}\right)(\alpha_i r)^3\right)Ae^{-\alpha_i r} - \left(1 + \alpha_k r + \left(\frac{2}{5}\right)(\alpha_k r)^2 + \left(\frac{1}{15}\right)(\alpha_k r)^3\right)Be^{-\alpha_k r}$$

$$\lambda_9 = 1 - \left(1 + \alpha_i r + \left(\frac{3}{7}\right)(\alpha_i r)^2 + \left(\frac{2}{21}\right)(\alpha_i r)^3 + \left(\frac{1}{105}\right)(\alpha_i r)^4\right)Ae^{-\alpha_i r} - \left(1 + \alpha_k r + \left(\frac{3}{7}\right)(\alpha_k r)^2 + \left(\frac{2}{21}\right)(\alpha_k r)^3 + \left(\frac{1}{105}\right)(\alpha_k r)^4\right)Be^{-\alpha_k r}$$

### C. Two site damping functions, $\alpha_i = \alpha_k$

$$\lambda_1 = 1 - \left(1 + \left(\frac{1}{2}\right)\alpha r\right)e^{-\alpha r}$$

$$\lambda_3 = 1 - \left(1 + ar + \left(\frac{1}{2}\right)(\alpha_i r)^2\right) e^{-ar}$$

$$\lambda_5 = 1 - \left(1 + ar + \left(\frac{1}{2}\right)(\alpha_i r)^2 + \left(\frac{1}{6}\right)(\alpha_i r)^3\right) e^{-ar}$$

$$\lambda_7 = 1 - \left(1 + ar + \left(\frac{1}{2}\right)(\alpha_i r)^2 + \left(\frac{1}{6}\right)(\alpha_i r)^3 + \left(\frac{1}{30}\right)(\alpha_i r)^4\right) e^{-ar}$$

$$\lambda_9 = 1 - \left(1 + ar + \left(\frac{1}{2}\right)(\alpha_i r)^2 + \left(\frac{1}{6}\right)(\alpha_i r)^3 + \left(\frac{4}{105}\right)(\alpha_i r)^4 + \left(\frac{1}{210}\right)(\alpha_i r)^5\right) e^{-ar}$$

## 2. S101x7 SAPT Electrostatics Fit Statistics

| <b>Multipole Only</b>            |           |             |
|----------------------------------|-----------|-------------|
| RMSE<br>(Root Mean Square Error) | 0.7 – 0.8 | 24.16611265 |
|                                  | 0.9 – 1.1 | 4.350677453 |
|                                  | Total     | 13.43047692 |
| MSE<br>(Mean Signed Error)       | 0.7 – 0.8 | 19.15611117 |
|                                  | 0.9 – 1.1 | 3.160407234 |
|                                  | Total     | 7.730608359 |
| MUE<br>(Mean Unsigned Error)     | 0.7 – 0.8 | 19.15611117 |
|                                  | 0.9 – 1.1 | 3.160407234 |
|                                  | Total     | 7.730608359 |
| Mean Percent Error               | 0.7 – 0.8 | 0.692902042 |
|                                  | 0.9 – 1.1 | 1.330447394 |
|                                  | Total     | 57.41457894 |
| Mean Absolute Percent Error      | 0.7 – 0.8 | 0.692902042 |
|                                  | 0.9 – 1.1 | 1.330447394 |
|                                  | Total     | 57.41457894 |

| <b>Model 1 – Charge-charge – Element-based Parameters</b> |           |             |
|-----------------------------------------------------------|-----------|-------------|
| RMSE<br>(Root Mean Square Error)                          | 0.7 – 0.8 | 3.530462178 |
|                                                           | 0.9 – 1.1 | 1.079421339 |
|                                                           | Total     | 2.096053384 |
| MSE<br>(Mean Signed Error)                                | 0.7 – 0.8 | 0.070609574 |
|                                                           | 0.9 – 1.1 | 0.443082553 |
|                                                           | Total     | 0.336661702 |
| MUE<br>(Mean Unsigned Error)                              | 0.7 – 0.8 | 2.483826596 |
|                                                           | 0.9 – 1.1 | 0.699765532 |

|                             |           |             |
|-----------------------------|-----------|-------------|
|                             | Total     | 1.209497264 |
| Mean Percent Error          | 0.7 – 0.8 | 0.014649782 |
|                             | 0.9 – 1.1 | 0.083136474 |
|                             | Total     | 3.178442377 |
| Mean Absolute Percent Error | 0.7 – 0.8 | 0.100161271 |
|                             | 0.9 – 1.1 | 0.247685764 |
|                             | Total     | 10.27679545 |

| <b>Model 2 – Charge-charge – Element-based Parameters</b> |           |              |
|-----------------------------------------------------------|-----------|--------------|
| RMSE<br>(Root Mean Square Error)                          | 0.7 – 0.8 | 3.416100288  |
|                                                           | 0.9 – 1.1 | 1.196352255  |
|                                                           | Total     | 2.087232479  |
| MSE<br>(Mean Signed Error)                                | 0.7 – 0.8 | 0.078644681  |
|                                                           | 0.9 – 1.1 | -0.51620766  |
|                                                           | Total     | -0.346249848 |
| MUE<br>(Mean Unsigned Error)                              | 0.7 – 0.8 | 2.524932979  |
|                                                           | 0.9 – 1.1 | 0.885186383  |
|                                                           | Total     | 1.35368541   |
| Mean Percent Error                                        | 0.7 – 0.8 | -0.024265813 |
|                                                           | 0.9 – 1.1 | -0.456742535 |
|                                                           | Total     | -16.65888785 |
| Mean Absolute Percent Error                               | 0.7 – 0.8 | 0.110418585  |
|                                                           | 0.9 – 1.1 | 0.537220758  |
|                                                           | Total     | 20.76386398  |

| <b>Model 3 – Charge-charge – Element-based Parameters</b> |           |             |
|-----------------------------------------------------------|-----------|-------------|
| RMSE<br>(Root Mean Square Error)                          | 0.7 – 0.8 | 8.245733619 |
|                                                           | 0.9 – 1.1 | 1.070226765 |
|                                                           | Total     | 4.499383648 |
| MSE<br>(Mean Signed Error)                                | 0.7 – 0.8 | 0.988135106 |
|                                                           | 0.9 – 1.1 | 0.034202979 |
|                                                           | Total     | 0.306755015 |
| MUE<br>(Mean Unsigned Error)                              | 0.7 – 0.8 | 3.662237234 |
|                                                           | 0.9 – 1.1 | 0.671327234 |
|                                                           | Total     | 1.525872948 |
| Mean Percent Error                                        | 0.7 – 0.8 | 0.036913509 |
|                                                           | 0.9 – 1.1 | 0.046321109 |
|                                                           | Total     | 2.181661167 |
| Mean Absolute Percent Error                               | 0.7 – 0.8 | 0.166713556 |
|                                                           | 0.9 – 1.1 | 0.39171247  |
|                                                           | Total     | 16.37135331 |

| <b>Model 1 – Charge-charge – Class-based Parameters</b> |           |             |
|---------------------------------------------------------|-----------|-------------|
| RMSE<br>(Root Mean Square Error)                        | 0.7 – 0.8 | 2.746166031 |
|                                                         | 0.9 – 1.1 | 0.989597309 |
|                                                         | Total     | 1.689436504 |
| MSE<br>(Mean Signed Error)                              | 0.7 – 0.8 | 0.087677128 |
|                                                         | 0.9 – 1.1 | 0.396219574 |
|                                                         | Total     | 0.30806459  |
| MUE<br>(Mean Unsigned Error)                            | 0.7 – 0.8 | 1.970433511 |
|                                                         | 0.9 – 1.1 | 0.633159574 |
|                                                         | Total     | 1.015237842 |
| Mean Percent Error                                      | 0.7 – 0.8 | 0.00351084  |
|                                                         | 0.9 – 1.1 | 0.034173836 |
|                                                         | Total     | 1.270649006 |
| Mean Absolute Percent Error                             | 0.7 – 0.8 | 0.081690656 |
|                                                         | 0.9 – 1.1 | 0.225204723 |
|                                                         | Total     | 9.210035191 |

| <b>Model 2 – Charge-charge – Class-based Parameters</b> |           |              |
|---------------------------------------------------------|-----------|--------------|
| RMSE<br>(Root Mean Square Error)                        | 0.7 – 0.8 | 3.038892269  |
|                                                         | 0.9 – 1.1 | 1.043989404  |
|                                                         | Total     | 1.848524579  |
| MSE<br>(Mean Signed Error)                              | 0.7 – 0.8 | 0.03548617   |
|                                                         | 0.9 – 1.1 | -0.415489574 |
|                                                         | Total     | -0.286639362 |
| MUE<br>(Mean Unsigned Error)                            | 0.7 – 0.8 | 2.32576383   |
|                                                         | 0.9 – 1.1 | 0.759034255  |
|                                                         | Total     | 1.206671277  |
| Mean Percent Error                                      | 0.7 – 0.8 | -0.024980534 |
|                                                         | 0.9 – 1.1 | -0.379144054 |
|                                                         | Total     | -13.89772384 |
| Mean Absolute Percent Error                             | 0.7 – 0.8 | 0.104954218  |
|                                                         | 0.9 – 1.1 | 0.463356585  |
|                                                         | Total     | 18.04779542  |

| <b>Model 1 – Higher-order – Class-based Parameters</b> |           |             |
|--------------------------------------------------------|-----------|-------------|
| RMSE<br>(Root Mean Square Error)                       | 0.7 – 0.8 | 2.274214573 |
|                                                        | 0.9 – 1.1 | 0.566506743 |
|                                                        | Total     | 1.306508613 |
| MSE<br>(Mean Signed Error)                             | 0.7 – 0.8 | 0.047035638 |
|                                                        | 0.9 – 1.1 | 0.013938085 |

|                                |           |              |
|--------------------------------|-----------|--------------|
|                                | Total     | 0.023394529  |
| MUE<br>(Mean Unsigned Error)   | 0.7 – 0.8 | 1.529532447  |
|                                | 0.9 – 1.1 | 0.376271277  |
|                                | Total     | 0.705774468  |
| Mean Percent Error             | 0.7 – 0.8 | -0.003770317 |
|                                | 0.9 – 1.1 | -0.044059741 |
|                                | Total     | -1.627423843 |
| Mean Absolute Percent<br>Error | 0.7 – 0.8 | 0.061419216  |
|                                | 0.9 – 1.1 | 0.18531193   |
|                                | Total     | 7.495700609  |

| <b>Model 2 – Higher-order – Class-based Parameters</b> |           |              |
|--------------------------------------------------------|-----------|--------------|
| RMSE<br>(Root Mean Square Error)                       | 0.7 – 0.8 | 2.639920385  |
|                                                        | 0.9 – 1.1 | 0.661324567  |
|                                                        | Total     | 1.517757283  |
| MSE<br>(Mean Signed Error)                             | 0.7 – 0.8 | 0.009317553  |
|                                                        | 0.9 – 1.1 | -0.115076596 |
|                                                        | Total     | -0.07953541  |
| MUE<br>(Mean Unsigned Error)                           | 0.7 – 0.8 | 1.817476064  |
|                                                        | 0.9 – 1.1 | 0.466214043  |
|                                                        | Total     | 0.852288906  |
| Mean Percent Error                                     | 0.7 – 0.8 | -0.013435382 |
|                                                        | 0.9 – 1.1 | -0.151155074 |
|                                                        | Total     | -5.590329517 |
| Mean Absolute Percent<br>Error                         | 0.7 – 0.8 | 0.074795428  |
|                                                        | 0.9 – 1.1 | 0.248929303  |
|                                                        | Total     | 9.958838368  |

### 3. TA:TA Step Plots for Nucleic Acid Base Structural Parameters

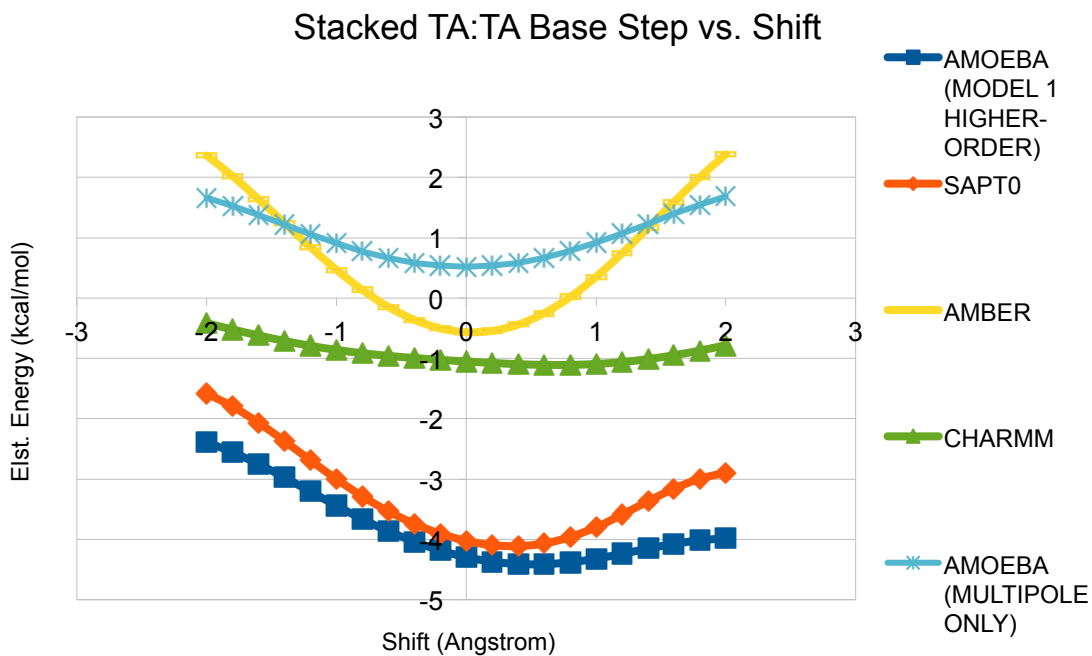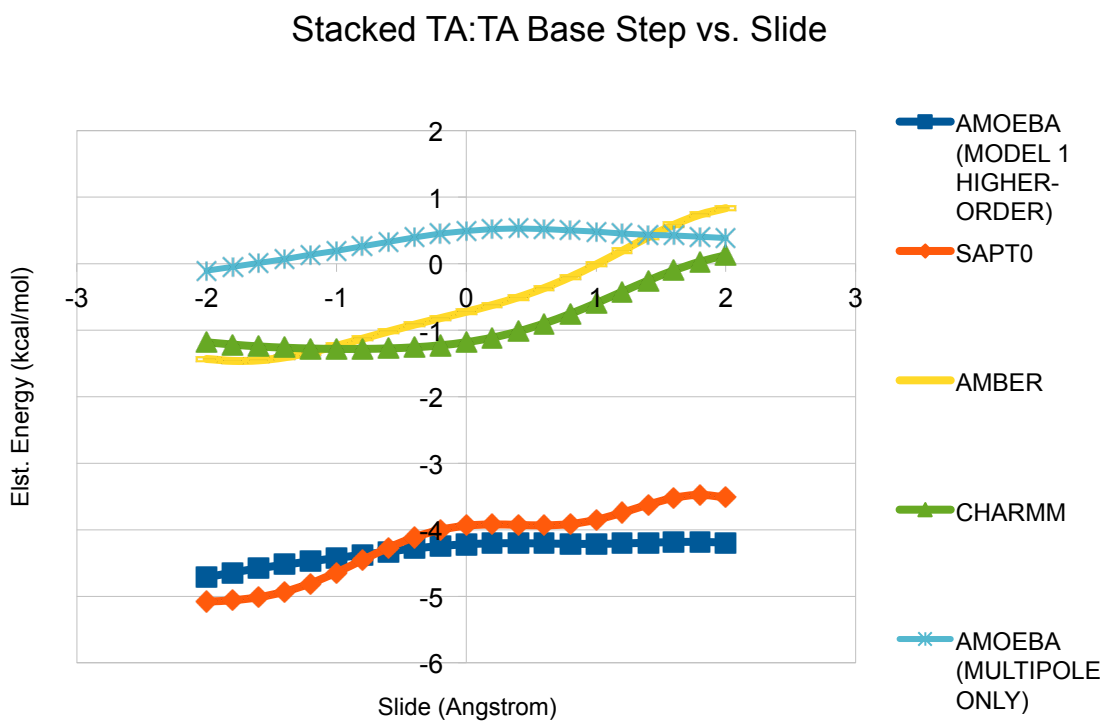

### Stacked TA:TA Base Step vs. Roll

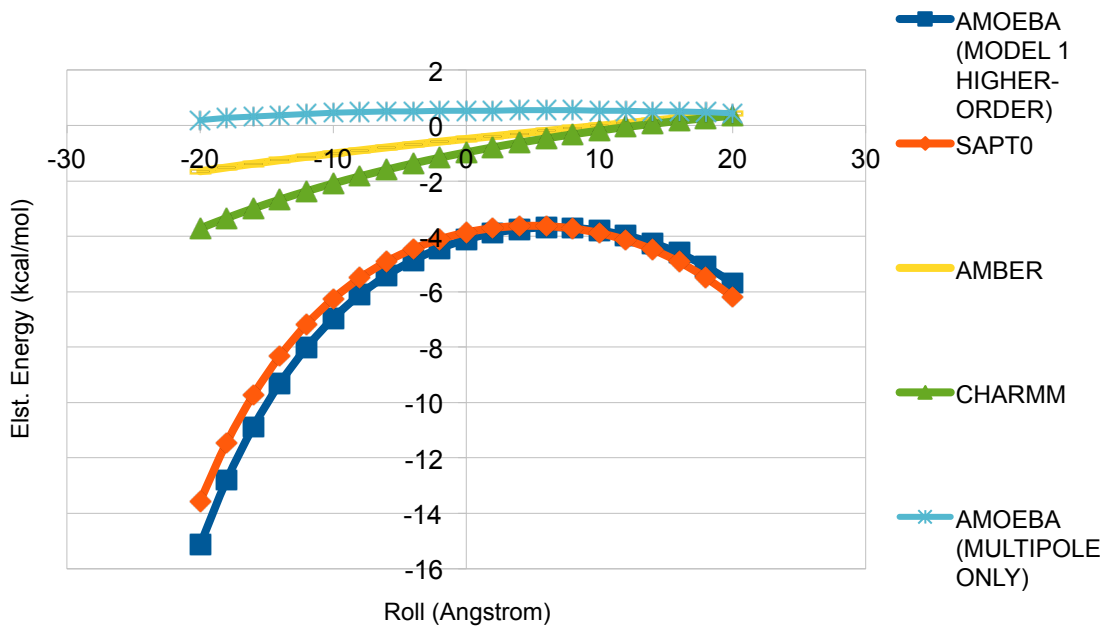

### Stacked TA:TA Base Step vs. Twist

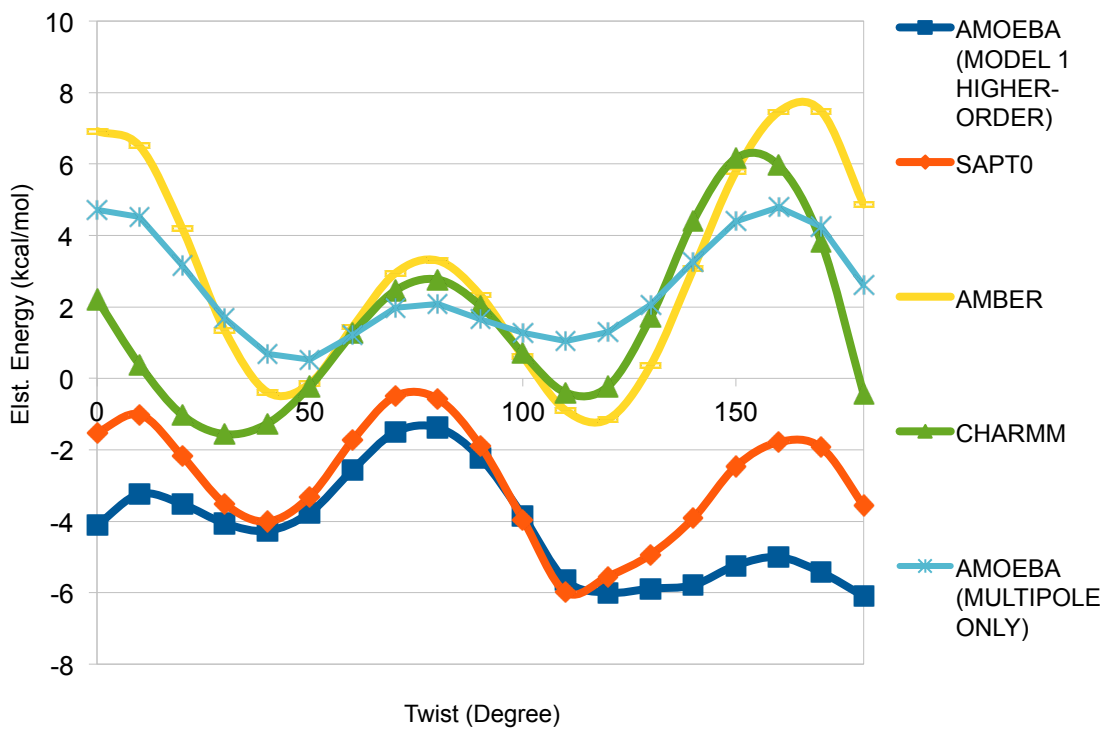

Supplement: NIHMS833208-supplement-ESI.pdf [file NIHMS833208-supplement-ESI.pdf]
